# Supplementary material for: Chinese Herbal Medicine Dingji Fumai Decoction for Ventricular Premature Contraction: A Real‐World Trial
Source: Hindawi journal article supplement (doi:10.1155/2020/5358467), 2020-01-01
Supplement: f1 [file 5358467.f1.pdf]

Table S1. TSS with heart blood asthenia of palpitation

| Items                |                     | Classification |   |   |   | Score |
|----------------------|---------------------|----------------|---|---|---|-------|
| Primary Symptoms     | Palpitation         | 0              | 2 | 4 | 6 |       |
|                      | Dizzy               | 0              | 2 | 4 | 6 |       |
|                      | Complexion          | 0              | 2 | 4 | 6 |       |
|                      | Shortness of Breath | 0              | 2 | 4 | 6 |       |
| Secondary Symptoms   | Languid             | 1              | 2 | 3 | 4 |       |
|                      | Poor Appetite       | 1              | 2 | 3 | 4 |       |
|                      | Forgetfulness       | 1              | 2 | 3 | 4 |       |
|                      | Insomnia            | 1              | 2 | 3 | 4 |       |
| Tongue Manifestation | Tongue Reddish      | 0              |   | 2 |   |       |
|                      | Less Fur            | 0              |   | 2 |   |       |
| Pulse Manifestation  | Gracility           | 0              |   | 2 |   |       |
| Total                |                     |                |   |   |   |       |

Note: The primary symptoms were divided into none, mild, moderate and severe four classifications, and then scored 0, 2, 4 and 6, respectively. Again, the secondary symptoms were also classified into 4 grades and scored 1, 2, 3 and 4, respectively. For tongue and pulse manifestation, there were only two grades: with and without, and marked 2 and 0, respectively.
